# Supplementary material for: Mirror-Image Organometallic Osmium Arene Iminopyridine Halido Complexes Exhibit Similar Potent Anticancer Activity
Source: PubMed Central journal article supplement (PMC4280897; doi:10.1002/chem.201302183), 2013-09-23
Supplement: chem0019-15199-sd1.pdf [file chem0019-15199-sd1.pdf]

# **CHEMISTRY**

---

## **A EUROPEAN JOURNAL**

---

### Supporting Information

© Copyright Wiley-VCH Verlag GmbH & Co. KGaA, 69451 Weinheim, 2013

#### **Mirror-Image Organometallic Osmium Arene Iminopyridine Halido Complexes Exhibit Similar Potent Anticancer Activity**

**Ying Fu,<sup>[a]</sup> Rina Soni,<sup>[a]</sup> María J. Romero,<sup>[a]</sup> Ana M. Pizarro,<sup>[a]</sup> Luca Salassa,<sup>[a, b]</sup>  
Guy J. Clarkson,<sup>[a]</sup> Jessica M. Hearn,<sup>[a, c]</sup> Abraha Habtemariam,<sup>[a]</sup> Martin Wills,<sup>[a]</sup> and  
Peter J. Sadler<sup>\*[a]</sup>**

chem\_201302183\_sm\_miscellaneous\_information.pdf

## **SUPPORTING INFORMATION**

### **Contents:**

**Tables S1-S4**

**Figures S1-S5**

**Table S1.** Anticancer activity in the NCI 60-cell line screen. (A) complex 2 (NSC: D-758116/1), (B) complex 4 (NSC: D-758118/1). GI<sub>50</sub> = IC<sub>50</sub>: the concentration that inhibits cell growth by 50%.

**(A) Complex 2**

| National Cancer Institute Developmental Therapeutics Program<br>In-Vitro Testing Results |       |       |       |                        |                                       |       |       |                |      |                |      |               |           |           |           |
|------------------------------------------------------------------------------------------|-------|-------|-------|------------------------|---------------------------------------|-------|-------|----------------|------|----------------|------|---------------|-----------|-----------|-----------|
| NSC : D - 758116 / 1                                                                     |       |       |       |                        | Experiment ID : 1106NS66              |       |       |                |      | Test Type : 08 |      | Units : Molar |           |           |           |
| Report Date : August 29, 2011                                                            |       |       |       |                        | Test Date : June 20, 2011             |       |       |                |      | QNS :          |      | MC :          |           |           |           |
| COMI : FY175A (105701)                                                                   |       |       |       |                        | Stain Reagent : SRB Dual-Pass Related |       |       |                |      | SSPL : 0Y4T    |      |               |           |           |           |
| Panel/Cell Line                                                                          | Time  | Zero  | Ctrl  | Log10 Concentration    |                                       |       |       | Percent Growth |      |                |      |               | GI50      | TGI       | LC50      |
|                                                                                          |       |       |       | Mean Optical Densities |                                       |       |       | -8.0           | -7.0 | -6.0           | -5.0 | -4.0          |           |           |           |
| <b>Leukemia</b>                                                                          |       |       |       |                        |                                       |       |       |                |      |                |      |               |           |           |           |
| HL-60(TB)                                                                                | 0.836 | 2.721 | 2.765 | 2.886                  | 2.834                                 | 1.095 | 0.503 | 102            | 109  | 106            | 14   | -40           | 4.04E-6   | 1.80E-5   | > 1.00E-4 |
| MOLT-4                                                                                   | 0.495 | 2.013 | 2.008 | 2.002                  | 2.010                                 | 1.558 | 0.589 | 100            | 99   | 100            | 70   | 6             | 2.06E-5   | > 1.00E-4 | > 1.00E-4 |
| SR                                                                                       | 0.409 | 1.836 | 1.688 | 1.633                  | 1.554                                 | 1.025 | 0.422 | 90             | 86   | 80             | 43   | 1             | 6.54E-6   | > 1.00E-4 | > 1.00E-4 |
| <b>Non-Small Cell Lung Cancer</b>                                                        |       |       |       |                        |                                       |       |       |                |      |                |      |               |           |           |           |
| A549(ATCC)                                                                               | 0.264 | 1.402 | 1.384 | 1.301                  | 1.247                                 | 0.867 | 0.491 | 98             | 91   | 86             | 53   | 20            | 1.23E-5   | > 1.00E-4 | > 1.00E-4 |
| EKVX                                                                                     | 0.774 | 1.837 | 1.803 | 1.728                  | 1.658                                 | 1.202 | 0.936 | 97             | 90   | 83             | 40   | 15            | 5.91E-6   | > 1.00E-4 | > 1.00E-4 |
| HOP-62                                                                                   | 0.479 | 1.362 | 1.362 | 1.364                  | 1.308                                 | 0.827 | 0.618 | 100            | 100  | 94             | 39   | 16            | 6.38E-6   | > 1.00E-4 | > 1.00E-4 |
| HOP-92                                                                                   | 1.062 | 1.466 | 1.470 | 1.494                  | 1.391                                 | 1.086 | 0.617 | 101            | 107  | 82             | 6    | -42           | 2.61E-6   | 1.32E-5   | > 1.00E-4 |
| NCI-H226                                                                                 | 0.558 | 1.441 | 1.391 | 1.377                  | 1.363                                 | 1.172 | 0.806 | 94             | 93   | 91             | 70   | 28            | 2.95E-5   | > 1.00E-4 | > 1.00E-4 |
| NCI-H23                                                                                  | 0.486 | 1.697 | 1.690 | 1.677                  | 1.661                                 | 1.074 | 0.575 | 99             | 98   | 97             | 49   | 7             | 9.33E-6   | > 1.00E-4 | > 1.00E-4 |
| NCI-H322M                                                                                | 0.705 | 1.703 | 1.594 | 1.583                  | 1.634                                 | 1.608 | 0.979 | 89             | 88   | 93             | 90   | 27            | 4.38E-5   | > 1.00E-4 | > 1.00E-4 |
| NCI-H460                                                                                 | 0.246 | 2.527 | 2.635 | 2.638                  | 2.522                                 | 0.823 | 0.361 | 105            | 105  | 100            | 25   | 5             | 4.66E-6   | > 1.00E-4 | > 1.00E-4 |
| NCI-H522                                                                                 | 0.526 | 1.267 | 1.219 | 1.262                  | 1.176                                 | 0.603 | 0.240 | 94             | 99   | 88             | 10   | -54           | 3.07E-6   | 1.45E-5   | 8.56E-5   |
| <b>Colon Cancer</b>                                                                      |       |       |       |                        |                                       |       |       |                |      |                |      |               |           |           |           |
| COLO 205                                                                                 | 0.240 | 1.400 | 1.447 | 1.396                  | 1.096                                 | 0.080 | 0.084 | 104            | 100  | 74             | -67  | -65           | 1.48E-6   | 3.35E-6   | 7.59E-6   |
| HCC-2998                                                                                 | 0.539 | 2.052 | 1.939 | 1.948                  | 1.874                                 | 1.053 | 0.573 | 93             | 93   | 88             | 34   | 2             | 5.06E-6   | > 1.00E-4 | > 1.00E-4 |
| HCT-116                                                                                  | 0.226 | 1.675 | 1.716 | 1.714                  | 1.576                                 | 0.577 | 0.303 | 103            | 103  | 93             | 24   | 5             | 4.23E-6   | > 1.00E-4 | > 1.00E-4 |
| HCT-15                                                                                   | 0.301 | 1.793 | 1.843 | 1.864                  | 1.733                                 | 1.843 | 1.545 | 103            | 105  | 96             | 103  | 83            | > 1.00E-4 | > 1.00E-4 | > 1.00E-4 |
| HT29                                                                                     | 0.175 | 1.115 | 1.159 | 1.140                  | 1.133                                 | 0.529 | 0.200 | 105            | 103  | 102            | 38   | 3             | 6.42E-6   | > 1.00E-4 | > 1.00E-4 |
| KM12                                                                                     | 0.441 | 2.391 | 2.421 | 2.443                  | 2.344                                 | 1.007 | 0.570 | 102            | 103  | 98             | 29   | 7             | 4.95E-6   | > 1.00E-4 | > 1.00E-4 |
| SW-620                                                                                   | 0.199 | 1.349 | 1.370 | 1.373                  | 1.317                                 | 0.747 | 0.329 | 102            | 102  | 97             | 48   | 11            | 8.96E-6   | > 1.00E-4 | > 1.00E-4 |
| <b>CNS Cancer</b>                                                                        |       |       |       |                        |                                       |       |       |                |      |                |      |               |           |           |           |
| SF-268                                                                                   | 0.360 | 1.296 | 1.300 | 1.311                  | 1.332                                 | 0.752 | 0.521 | 100            | 102  | 104            | 42   | 17            | 7.38E-6   | > 1.00E-4 | > 1.00E-4 |
| SF-295                                                                                   | 0.860 | 2.494 | 2.359 | 2.291                  | 2.350                                 | 2.272 | 1.010 | 92             | 88   | 91             | 86   | 9             | 2.96E-5   | > 1.00E-4 | > 1.00E-4 |
| SF-539                                                                                   | 0.572 | 1.550 | 1.613 | 1.598                  | 1.591                                 | 1.049 | 0.696 | 106            | 105  | 104            | 49   | 13            | 9.49E-6   | > 1.00E-4 | > 1.00E-4 |
| SNB-19                                                                                   | 0.503 | 1.641 | 1.542 | 1.529                  | 1.466                                 | 0.858 | 0.736 | 91             | 90   | 85             | 31   | 20            | 4.45E-6   | > 1.00E-4 | > 1.00E-4 |
| SNB-75                                                                                   | 0.771 | 1.288 | 1.213 | 1.195                  | 1.220                                 | 0.813 | 0.527 | 85             | 82   | 87             | 8    | -32           | 2.94E-6   | 1.60E-5   | > 1.00E-4 |
| U251                                                                                     | 0.239 | 1.064 | 1.056 | 1.043                  | 0.960                                 | 0.481 | 0.325 | 99             | 97   | 87             | 29   | 10            | 4.40E-6   | > 1.00E-4 | > 1.00E-4 |
| <b>Melanoma</b>                                                                          |       |       |       |                        |                                       |       |       |                |      |                |      |               |           |           |           |
| LOX IMVI                                                                                 | 0.214 | 1.406 | 1.377 | 1.309                  | 1.269                                 | 0.536 | 0.228 | 98             | 92   | 89             | 27   | 1             | 4.23E-6   | > 1.00E-4 | > 1.00E-4 |
| MALME-3M                                                                                 | 0.626 | 1.007 | 0.974 | 0.962                  | 0.928                                 | 0.734 | 0.414 | 91             | 88   | 79             | 28   | -34           | 3.74E-6   | 2.85E-5   | > 1.00E-4 |
| M14                                                                                      | 0.405 | 1.617 | 1.647 | 1.692                  | 1.609                                 | 1.310 | 0.457 | 102            | 106  | 99             | 75   | 4             | 2.24E-5   | > 1.00E-4 | > 1.00E-4 |
| MDA-MB-435                                                                               | 0.416 | 2.005 | 1.945 | 1.872                  | 1.778                                 | 0.637 | 0.266 | 96             | 92   | 86             | 14   | -36           | 3.14E-6   | 1.90E-5   | > 1.00E-4 |
| SK-MEL-2                                                                                 | 0.883 | 1.929 | 1.986 | 2.067                  | 1.976                                 | 1.096 | 0.344 | 105            | 113  | 105            | 20   | -61           | 4.44E-6   | 1.78E-5   | 7.31E-5   |
| SK-MEL-28                                                                                | 0.484 | 1.298 | 1.294 | 1.318                  | 1.238                                 | 0.865 | 0.311 | 100            | 102  | 93             | 47   | -36           | 8.50E-6   | 3.69E-5   | > 1.00E-4 |
| SK-MEL-5                                                                                 | 0.517 | 2.279 | 2.208 | 2.134                  | 1.938                                 | 0.394 | 0.009 | 96             | 92   | 81             | -24  | -98           | 1.96E-6   | 5.91E-6   | 2.24E-5   |
| UACC-257                                                                                 | 0.628 | 1.415 | 1.362 | 1.384                  | 1.256                                 | 0.683 | 0.396 | 93             | 96   | 80             | 7    | -37           | 2.57E-6   | 1.44E-5   | > 1.00E-4 |
| UACC-62                                                                                  | 0.701 | 2.474 | 2.328 | 2.298                  | 2.130                                 | 1.201 | 0.221 | 92             | 90   | 81             | 28   | -69           | 3.83E-6   | 1.96E-5   | 6.43E-5   |
| <b>Ovarian Cancer</b>                                                                    |       |       |       |                        |                                       |       |       |                |      |                |      |               |           |           |           |
| IGROV1                                                                                   | 0.425 | 1.468 | 1.502 | 1.445                  | 1.402                                 | 0.933 | 0.393 | 103            | 98   | 94             | 49   | -8            | 9.34E-6   | 7.35E-5   | > 1.00E-4 |
| OVCAR-3                                                                                  | 0.455 | 1.472 | 1.518 | 1.492                  | 1.338                                 | 0.676 | 0.489 | 105            | 102  | 87             | 22   | 3             | 3.68E-6   | > 1.00E-4 | > 1.00E-4 |
| OVCAR-4                                                                                  | 0.677 | 1.724 | 1.711 | 1.760                  | 1.571                                 | 0.827 | 0.672 | 99             | 103  | 85             | 14   | -1            | 3.14E-6   | 8.93E-5   | > 1.00E-4 |
| OVCAR-5                                                                                  | 0.487 | 1.148 | 1.157 | 1.145                  | 1.106                                 | 0.984 | 0.561 | 101            | 100  | 94             | 75   | 11            | 2.48E-5   | > 1.00E-4 | > 1.00E-4 |
| OVCAR-8                                                                                  | 0.321 | 1.343 | 1.309 | 1.331                  | 1.304                                 | 0.693 | 0.408 | 97             | 99   | 96             | 36   | 8             | 5.92E-6   | > 1.00E-4 | > 1.00E-4 |
| NCI/ADR-RES                                                                              | 0.467 | 1.528 | 1.507 | 1.501                  | 1.504                                 | 1.534 | 1.548 | 98             | 97   | 98             | 101  | 102           | > 1.00E-4 | > 1.00E-4 | > 1.00E-4 |
| SK-OV-3                                                                                  | 0.485 | 1.258 | 1.201 | 1.222                  | 1.233                                 | 1.156 | 0.695 | 93             | 95   | 97             | 87   | 27            | 4.14E-5   | > 1.00E-4 | > 1.00E-4 |
| <b>Renal Cancer</b>                                                                      |       |       |       |                        |                                       |       |       |                |      |                |      |               |           |           |           |
| 786-0                                                                                    | 0.595 | 1.950 | 1.957 | 1.973                  | 1.896                                 | 2.023 | 0.952 | 100            | 102  | 96             | 105  | 26            | 5.02E-5   | > 1.00E-4 | > 1.00E-4 |
| A498                                                                                     | 1.041 | 2.028 | 2.013 | 2.027                  | 1.995                                 | 1.970 | 1.516 | 98             | 100  | 97             | 94   | 48            | 9.12E-5   | > 1.00E-4 | > 1.00E-4 |
| ACHN                                                                                     | 0.410 | 1.630 | 1.587 | 1.681                  | 1.570                                 | 1.543 | 1.234 | 96             | 104  | 95             | 93   | 68            | > 1.00E-4 | > 1.00E-4 | > 1.00E-4 |
| CAKI-1                                                                                   | 0.760 | 2.257 | 2.189 | 2.162                  | 2.167                                 | 2.231 | 2.275 | 95             | 94   | 94             | 98   | 101           | > 1.00E-4 | > 1.00E-4 | > 1.00E-4 |
| RXF 393                                                                                  | 0.282 | 0.749 | 0.744 | 0.751                  | 0.722                                 | 0.698 | 0.329 | 99             | 101  | 94             | 89   | 10            | 3.12E-5   | > 1.00E-4 | > 1.00E-4 |
| SN12C                                                                                    | 0.524 | 1.993 | 1.834 | 1.898                  | 1.771                                 | 1.089 | 0.676 | 89             | 94   | 85             | 38   | 10            | 5.64E-6   | > 1.00E-4 | > 1.00E-4 |
| TK-10                                                                                    | 0.583 | 1.405 | 1.440 | 1.443                  | 1.466                                 | 1.368 | 0.861 | 104            | 105  | 107            | 95   | 34            | 5.46E-5   | > 1.00E-4 | > 1.00E-4 |
| UO-31                                                                                    | 0.535 | 1.488 | 1.374 | 1.324                  | 1.333                                 | 1.422 | 1.399 | 88             | 83   | 84             | 93   | 91            | > 1.00E-4 | > 1.00E-4 | > 1.00E-4 |
| <b>Prostate Cancer</b>                                                                   |       |       |       |                        |                                       |       |       |                |      |                |      |               |           |           |           |
| PC-3                                                                                     | 0.493 | 1.665 | 1.664 | 1.620                  | 1.542                                 | 0.797 | 0.550 | 100            | 96   | 90             | 26   | 5             | 4.18E-6   | > 1.00E-4 | > 1.00E-4 |
| DU-145                                                                                   | 0.410 | 1.631 | 1.710 | 1.667                  | 1.710                                 | 1.146 | 0.766 | 106            | 103  | 106            | 60   | 29            | 2.14E-5   | > 1.00E-4 | > 1.00E-4 |
| <b>Breast Cancer</b>                                                                     |       |       |       |                        |                                       |       |       |                |      |                |      |               |           |           |           |
| MCF7                                                                                     | 0.549 | 2.170 | 2.092 | 2.092                  | 2.102                                 | 0.918 | 0.640 | 95             | 95   | 96             | 23   | 6             | 4.24E-6   | > 1.00E-4 | > 1.00E-4 |
| MDA-MB-231(ATCC)                                                                         | 0.465 | 1.121 | 1.095 | 1.121                  | 1.089                                 | 0.766 | 0.366 | 96             | 100  | 95             | 46   | -21           | 8.24E-6   | 4.82E-5   | > 1.00E-4 |
| HS 578T                                                                                  | 0.722 | 1.541 | 1.559 | 1.566                  | 1.584                                 | 1.368 | 0.958 | 102            | 103  | 105            | 79   | 29            | 3.77E-5   | > 1.00E-4 | > 1.00E-4 |
| BT-549                                                                                   | 0.750 | 1.565 | 1.583 | 1.583                  | 1.566                                 | 0.986 | 0.709 | 102            | 102  | 100            | 29   | -5            | 5.06E-6   | 6.94E-5   | > 1.00E-4 |
| T-47D                                                                                    | 0.518 | 1.169 | 1.173 | 1.167                  | 1.069                                 | 0.692 | 0.580 | 101            | 100  | 85             | 27   | 10            | 3.96E-6   | > 1.00E-4 | > 1.00E-4 |
| MDA-MB-468                                                                               | 0.569 | 1.477 | 1.397 | 1.354                  | 0.963                                 | 0.508 | 0.163 | 91             | 87   | 43             | -11  | -71           | 7.03E-7   | 6.32E-6   | 4.44E-5   |

**(B) Complex 4**

| National Cancer Institute Developmental Therapeutics Program<br>In-Vitro Testing Results |           |       |                        |                                       |       |       |       |                |                |      |      |               |           |           |           |  |
|------------------------------------------------------------------------------------------|-----------|-------|------------------------|---------------------------------------|-------|-------|-------|----------------|----------------|------|------|---------------|-----------|-----------|-----------|--|
| NSC : D - 758118 / 1                                                                     |           |       |                        | Experiment ID : 1106NS66              |       |       |       |                | Test Type : 08 |      |      | Units : Molar |           |           |           |  |
| Report Date : August 29, 2011                                                            |           |       |                        | Test Date : June 20, 2011             |       |       |       |                | QNS :          |      |      | MC :          |           |           |           |  |
| COMI : FY178A (105704)                                                                   |           |       |                        | Stain Reagent : SRB Dual-Pass Related |       |       |       |                | SSPL : 0Y4T    |      |      |               |           |           |           |  |
| Panel/Cell Line                                                                          | Time Zero | Ctrl  | Log10 Concentration    |                                       |       |       |       | Percent Growth |                |      |      |               | GI50      | TGI       | LC50      |  |
|                                                                                          |           |       | Mean Optical Densities |                                       |       |       |       | -8.0           | -7.0           | -6.0 | -5.0 | -4.0          |           |           |           |  |
| <b>Leukemia</b>                                                                          |           |       |                        |                                       |       |       |       |                |                |      |      |               |           |           |           |  |
| HL-60(TB)                                                                                | 0.836     | 2.696 | 2.687                  | 2.602                                 | 2.287 | 0.912 | 0.397 | 99             | 95             | 78   | 4    | -53           | 2.39E-6   | 1.18E-5   | 9.01E-5   |  |
| MOLT-4                                                                                   | 0.495     | 1.972 | 1.919                  | 1.903                                 | 1.838 | 1.168 | 0.629 | 96             | 95             | 91   | 46   | 9             | 7.99E-6   | > 1.00E-4 | > 1.00E-4 |  |
| SR                                                                                       | 0.409     | 1.757 | 1.686                  | 1.574                                 | 1.499 | 0.594 | 0.375 | 95             | 86             | 81   | 14   | -8            | 2.88E-6   | 4.19E-5   | > 1.00E-4 |  |
| <b>Non-Small Cell Lung Cancer</b>                                                        |           |       |                        |                                       |       |       |       |                |                |      |      |               |           |           |           |  |
| A549/ATCC                                                                                | 0.264     | 1.381 | 1.317                  | 1.302                                 | 1.316 | 0.737 | 0.414 | 94             | 93             | 94   | 42   | 13            | 7.12E-6   | > 1.00E-4 | > 1.00E-4 |  |
| EKVX                                                                                     | 0.774     | 1.827 | 1.806                  | 1.709                                 | 1.589 | 1.113 | 0.945 | 98             | 89             | 77   | 32   | 16            | 4.03E-6   | > 1.00E-4 | > 1.00E-4 |  |
| HOP-62                                                                                   | 0.479     | 1.320 | 1.291                  | 1.270                                 | 1.281 | 0.788 | 0.494 | 97             | 94             | 95   | 37   | 2             | 5.94E-6   | > 1.00E-4 | > 1.00E-4 |  |
| HOP-92                                                                                   | 1.062     | 1.449 | 1.462                  | 1.429                                 | 1.433 | 0.911 | 0.547 | 103            | 95             | 96   | -14  | -49           | 2.61E-6   | 7.43E-6   | > 1.00E-4 |  |
| NCI-H226                                                                                 | 0.558     | 1.452 | 1.397                  | 1.393                                 | 1.363 | 1.144 | 0.777 | 94             | 93             | 90   | 66   | 25            | 2.39E-5   | > 1.00E-4 | > 1.00E-4 |  |
| NCI-H23                                                                                  | 0.486     | 1.662 | 1.616                  | 1.612                                 | 1.580 | 0.858 | 0.524 | 96             | 96             | 93   | 32   | 3             | 5.02E-6   | > 1.00E-4 | > 1.00E-4 |  |
| NCI-H322M                                                                                | 0.705     | 1.773 | 1.705                  | 1.635                                 | 1.627 | 1.491 | 0.870 | 94             | 87             | 86   | 74   | 15            | 2.55E-5   | > 1.00E-4 | > 1.00E-4 |  |
| NCI-H460                                                                                 | 0.246     | 2.506 | 2.649                  | 2.590                                 | 2.495 | 0.812 | 0.356 | 106            | 104            | 100  | 25   | 5             | 4.62E-6   | > 1.00E-4 | > 1.00E-4 |  |
| NCI-H522                                                                                 | 0.526     | 1.261 | 1.185                  | 1.241                                 | 1.057 | 0.542 | 0.185 | 90             | 97             | 72   | 2    | -65           | 2.07E-6   | 1.08E-5   | 6.01E-5   |  |
| <b>Colon Cancer</b>                                                                      |           |       |                        |                                       |       |       |       |                |                |      |      |               |           |           |           |  |
| COLO 205                                                                                 | 0.240     | 1.309 | 1.309                  | 1.310                                 | 1.071 | 0.065 | 0.083 | 100            | 100            | 78   | -73  | -66           | 1.53E-6   | 3.28E-6   | 7.04E-6   |  |
| HCC-2998                                                                                 | 0.539     | 1.834 | 1.785                  | 1.829                                 | 1.731 | 0.866 | 0.471 | 96             | 100            | 92   | 25   | -13           | 4.26E-6   | 4.64E-5   | > 1.00E-4 |  |
| HCT-116                                                                                  | 0.226     | 1.735 | 1.775                  | 1.805                                 | 1.696 | 0.552 | 0.283 | 103            | 105            | 97   | 22   | 4             | 4.22E-6   | > 1.00E-4 | > 1.00E-4 |  |
| HCT-15                                                                                   | 0.301     | 1.877 | 1.769                  | 1.862                                 | 1.874 | 1.881 | 1.689 | 93             | 99             | 100  | 100  | 88            | > 1.00E-4 | > 1.00E-4 | > 1.00E-4 |  |
| HT29                                                                                     | 0.175     | 1.073 | 1.081                  | 1.132                                 | 1.076 | 0.376 | 0.178 | 101            | 107            | 100  | 22   | 4             | 4.42E-6   | > 1.00E-4 | > 1.00E-4 |  |
| KM12                                                                                     | 0.441     | 2.358 | 2.398                  | 2.440                                 | 2.208 | 0.907 | 0.554 | 102            | 104            | 92   | 24   | 6             | 4.18E-6   | > 1.00E-4 | > 1.00E-4 |  |
| SVV-620                                                                                  | 0.199     | 1.345 | 1.363                  | 1.338                                 | 1.327 | 0.692 | 0.377 | 102            | 99             | 98   | 43   | 16            | 7.47E-6   | > 1.00E-4 | > 1.00E-4 |  |
| <b>CNS Cancer</b>                                                                        |           |       |                        |                                       |       |       |       |                |                |      |      |               |           |           |           |  |
| SF-268                                                                                   | 0.360     | 1.254 | 1.301                  | 1.330                                 | 1.282 | 0.636 | 0.449 | 105            | 109            | 103  | 31   | 10            | 5.43E-6   | > 1.00E-4 | > 1.00E-4 |  |
| SF-295                                                                                   | 0.860     | 2.358 | 2.257                  | 2.195                                 | 2.225 | 2.128 | 0.956 | 93             | 89             | 91   | 85   | 6             | 2.77E-5   | > 1.00E-4 | > 1.00E-4 |  |
| SF-539                                                                                   | 0.572     | 1.618 | 1.663                  | 1.643                                 | 1.636 | 0.933 | 0.691 | 104            | 102            | 102  | 34   | 11            | 5.88E-6   | > 1.00E-4 | > 1.00E-4 |  |
| SNB-19                                                                                   | 0.503     | 1.708 | 1.646                  | 1.643                                 | 1.518 | 0.843 | 0.737 | 95             | 95             | 84   | 28   | 19            | 4.09E-6   | > 1.00E-4 | > 1.00E-4 |  |
| SNB-75                                                                                   | 0.771     | 1.244 | 1.165                  | 1.215                                 | 1.149 | 0.736 | 0.549 | 83             | 94             | 80   | -5   | -29           | 2.25E-6   | 8.83E-6   | > 1.00E-4 |  |
| U251                                                                                     | 0.239     | 1.032 | 0.982                  | 0.974                                 | 0.876 | 0.400 | 0.274 | 94             | 93             | 80   | 20   | 4             | 3.20E-6   | > 1.00E-4 | > 1.00E-4 |  |
| <b>Melanoma</b>                                                                          |           |       |                        |                                       |       |       |       |                |                |      |      |               |           |           |           |  |
| LOX IMVI                                                                                 | 0.214     | 1.364 | 1.281                  | 1.305                                 | 1.242 | 0.425 | 0.205 | 93             | 95             | 89   | 18   | -4            | 3.58E-6   | 6.38E-5   | > 1.00E-4 |  |
| MALME-3M                                                                                 | 0.626     | 1.035 | 1.009                  | 0.974                                 | 0.911 | 0.652 | 0.350 | 94             | 85             | 70   | 6    | -44           | 2.04E-6   | 1.33E-5   | > 1.00E-4 |  |
| M14                                                                                      | 0.405     | 1.590 | 1.617                  | 1.598                                 | 1.542 | 1.272 | 0.642 | 102            | 101            | 96   | 73   | 20            | 2.72E-5   | > 1.00E-4 | > 1.00E-4 |  |
| MDA-MB-435                                                                               | 0.416     | 2.000 | 1.932                  | 1.883                                 | 1.678 | 0.573 | 0.296 | 96             | 93             | 80   | 10   | -29           | 2.66E-6   | 1.80E-5   | > 1.00E-4 |  |
| SK-MEL-2                                                                                 | 0.883     | 1.889 | 1.949                  | 2.025                                 | 1.995 | 1.013 | 0.290 | 106            | 114            | 111  | 13   | -67           | 4.17E-6   | 1.45E-5   | 6.11E-5   |  |
| SK-MEL-28                                                                                | 0.484     | 1.208 | 1.223                  | 1.258                                 | 1.152 | 0.782 | 0.277 | 102            | 107            | 92   | 41   | -43           | 6.89E-6   | 3.09E-5   | > 1.00E-4 |  |
| SK-MEL-5                                                                                 | 0.517     | 2.156 | 2.098                  | 2.089                                 | 1.700 | 0.276 | 0.006 | 96             | 96             | 72   | -47  | -99           | 1.54E-6   | 4.05E-6   | 1.16E-5   |  |
| UACC-257                                                                                 | 0.628     | 1.368 | 1.282                  | 1.277                                 | 1.169 | 0.607 | 0.415 | 88             | 88             | 73   | -3   | -34           | 2.01E-6   | 9.02E-6   | > 1.00E-4 |  |
| UACC-62                                                                                  | 0.701     | 2.381 | 2.278                  | 2.300                                 | 2.044 | 1.134 | 0.322 | 94             | 95             | 80   | 26   | -54           | 3.57E-6   | 2.10E-5   | 8.89E-5   |  |
| <b>Ovarian Cancer</b>                                                                    |           |       |                        |                                       |       |       |       |                |                |      |      |               |           |           |           |  |
| IGROV1                                                                                   | 0.425     | 1.457 | 1.523                  | 1.462                                 | 1.364 | 0.821 | 0.316 | 106            | 100            | 91   | 38   | -26           | 6.00E-6   | 3.97E-5   | > 1.00E-4 |  |
| OVCAR-3                                                                                  | 0.455     | 1.456 | 1.502                  | 1.527                                 | 1.327 | 0.620 | 0.442 | 105            | 107            | 87   | 16   | -3            | 3.35E-6   | 7.04E-5   | > 1.00E-4 |  |
| OVCAR-4                                                                                  | 0.677     | 1.661 | 1.795                  | 1.744                                 | 1.503 | 0.794 | 0.634 | 114            | 108            | 84   | 12   | -6            | 2.96E-6   | 4.46E-5   | > 1.00E-4 |  |
| OVCAR-5                                                                                  | 0.487     | 1.201 | 1.183                  | 1.190                                 | 1.188 | 0.927 | 0.523 | 98             | 99             | 98   | 62   | 5             | 1.60E-5   | > 1.00E-4 | > 1.00E-4 |  |
| OVCAR-8                                                                                  | 0.321     | 1.363 | 1.300                  | 1.316                                 | 1.272 | 0.779 | 0.379 | 94             | 95             | 91   | 44   | 6             | 7.44E-6   | > 1.00E-4 | > 1.00E-4 |  |
| NCI/ADR-RES                                                                              | 0.467     | 1.460 | 1.529                  | 1.468                                 | 1.468 | 1.514 | 1.497 | 107            | 101            | 101  | 105  | 104           | > 1.00E-4 | > 1.00E-4 | > 1.00E-4 |  |
| SK-OV-3                                                                                  | 0.485     | 1.215 | 1.191                  | 1.209                                 | 1.187 | 1.033 | 0.555 | 97             | 99             | 96   | 75   | 10            | 2.41E-5   | > 1.00E-4 | > 1.00E-4 |  |
| <b>Renal Cancer</b>                                                                      |           |       |                        |                                       |       |       |       |                |                |      |      |               |           |           |           |  |
| 786-0                                                                                    | 0.595     | 1.965 | 2.003                  | 1.970                                 | 1.979 | 2.056 | 1.259 | 103            | 100            | 101  | 107  | 48            | 9.39E-5   | > 1.00E-4 | > 1.00E-4 |  |
| A498                                                                                     | 1.041     | 2.009 | 1.921                  | 1.989                                 | 2.006 | 1.956 | 1.537 | 91             | 98             | 100  | 94   | 51            | > 1.00E-4 | > 1.00E-4 | > 1.00E-4 |  |
| ACHN                                                                                     | 0.410     | 1.618 | 1.638                  | 1.681                                 | 1.662 | 1.687 | 1.413 | 102            | 105            | 104  | 106  | 83            | > 1.00E-4 | > 1.00E-4 | > 1.00E-4 |  |
| CAKI-1                                                                                   | 0.760     | 2.236 | 2.157                  | 2.140                                 | 2.130 | 2.284 | 2.380 | 95             | 93             | 93   | 103  | 110           | > 1.00E-4 | > 1.00E-4 | > 1.00E-4 |  |
| RXF 393                                                                                  | 0.282     | 0.701 | 0.704                  | 0.693                                 | 0.688 | 0.685 | 0.390 | 101            | 98             | 97   | 96   | 26            | 4.53E-5   | > 1.00E-4 | > 1.00E-4 |  |
| SN12C                                                                                    | 0.524     | 1.943 | 1.867                  | 1.888                                 | 1.772 | 0.870 | 0.645 | 95             | 96             | 88   | 24   | 9             | 3.95E-6   | > 1.00E-4 | > 1.00E-4 |  |
| TK-10                                                                                    | 0.583     | 1.358 | 1.392                  | 1.392                                 | 1.390 | 1.359 | 0.924 | 104            | 104            | 104  | 100  | 44            | 7.81E-5   | > 1.00E-4 | > 1.00E-4 |  |
| UO-31                                                                                    | 0.535     | 1.535 | 1.389                  | 1.359                                 | 1.369 | 1.421 | 1.380 | 85             | 82             | 83   | 89   | 85            | > 1.00E-4 | > 1.00E-4 | > 1.00E-4 |  |
| <b>Prostate Cancer</b>                                                                   |           |       |                        |                                       |       |       |       |                |                |      |      |               |           |           |           |  |
| PC-3                                                                                     | 0.493     | 1.626 | 1.661                  | 1.610                                 | 1.367 | 0.691 | 0.511 | 103            | 99             | 77   | 17   | 2             | 2.85E-6   | > 1.00E-4 | > 1.00E-4 |  |
| DU-145                                                                                   | 0.410     | 1.609 | 1.735                  | 1.723                                 | 1.666 | 0.999 | 0.696 | 111            | 110            | 105  | 49   | 24            | 9.65E-6   | > 1.00E-4 | > 1.00E-4 |  |
| <b>Breast Cancer</b>                                                                     |           |       |                        |                                       |       |       |       |                |                |      |      |               |           |           |           |  |
| MCF7                                                                                     | 0.549     | 2.063 | 1.997                  | 2.018                                 | 1.945 | 0.741 | 0.537 | 96             | 97             | 92   | 13   | -2            | 3.39E-6   | 7.13E-5   | > 1.00E-4 |  |
| MDA-MB-231/ATCC                                                                          | 0.465     | 1.169 | 1.141                  | 1.129                                 | 1.049 | 0.648 | 0.333 | 96             | 94             | 83   | 26   | -28           | 3.78E-6   | 3.01E-5   | > 1.00E-4 |  |
| HS 578T                                                                                  | 0.722     | 1.577 | 1.597                  | 1.561                                 | 1.592 | 1.232 | 0.925 | 102            | 98             | 102  | 60   | 24            | 1.86E-5   | > 1.00E-4 | > 1.00E-4 |  |
| BT-549                                                                                   | 0.750     | 1.573 | 1.614                  | 1.632                                 | 1.616 | 0.918 | 0.754 | 105            | 107            | 105  | 20   | 4             | 4.48E-6   | > 1.00E-4 | > 1.00E-4 |  |
| T-47D                                                                                    | 0.518     | 1.166 | 1.139                  | 1.108                                 | 1.007 | 0.605 | 0.514 | 96             | 91             | 75   | 13   | -1            | 2.57E-6   | 8.69E-5   | > 1.00E-4 |  |
| MDA-MB-468                                                                               | 0.569     | 1.483 | 1.373                  | 1.371                                 | 0.895 | 0.489 | 0.145 | 88             | 88             | 36   | -14  | -75           | 5.30E-7   | 5.20E-6   | 3.93E-5   |  |

**Table S2**COMPARE results using NCI/DTP standard agents database for the IC<sub>50</sub> endpoint

| $(S_{Os}, S_c)$ -[Os( $\eta^6$ - <i>p</i> -cym)(ImpyMe)I]PF <sub>6</sub> ( <b>2</b> ) |       |                                | $(R_{Os}, R_c)$ -[Os( $\eta^6$ - <i>p</i> -cym)(ImpyMe)I]PF <sub>6</sub> ( <b>4</b> ) |       |                                |
|---------------------------------------------------------------------------------------|-------|--------------------------------|---------------------------------------------------------------------------------------|-------|--------------------------------|
| Correlated agent <sup>a</sup>                                                         | PCC   | Mechanism                      | Correlated agent <sup>a</sup>                                                         | PCC   | Mechanism                      |
| Vinblastine sulfate                                                                   | 0.743 | Antimicrotubule agent          | vinblastine sulfate                                                                   | 0.754 | Antimicrotubule agent          |
| phyllanthoside                                                                        | 0.630 | Inhibits protein synthesis     | macbecin II                                                                           | 0.672 | DNA antimetabolite             |
| chromomycin A3                                                                        | 0.624 | RNA antimetabolite (binds DNA) | phyllanthoside                                                                        | 0.669 | Inhibits protein synthesis     |
|                                                                                       |       |                                | chromomycin A3                                                                        | 0.640 | RNA antimetabolite (binds DNA) |
|                                                                                       |       |                                | paclitaxel (Taxol)                                                                    | 0.616 | Antimicrotubule agent          |
|                                                                                       |       |                                | bisantrene hydrochloride                                                              | 0.613 | Topo II inhibitor              |

<sup>a</sup> NCI/DTP database. Only those compounds with PCC > 0.6 are shown.**Table S3**

COMPARE results using NCI/DTP standard agents database for the TGI endpoint

| $(S_{Os}, S_c)$ -[Os( $\eta^6$ - <i>p</i> -cym)(ImpyMe)I]PF <sub>6</sub> ( <b>2</b> ) |              |              | $(R_{Os}, R_c)$ -[Os( $\eta^6$ - <i>p</i> -cym)(ImpyMe)I]PF <sub>6</sub> ( <b>4</b> ) |       |                  |
|---------------------------------------------------------------------------------------|--------------|--------------|---------------------------------------------------------------------------------------|-------|------------------|
| Correlated agent <sup>a</sup>                                                         | PCC          | Mechanism    | Correlated agent <sup>a</sup>                                                         | PCC   | Mechanism        |
| <sup>b</sup>                                                                          | <sup>b</sup> | <sup>b</sup> | echinomycin                                                                           | 0.603 | DNA intercalator |

<sup>a</sup> NCI/DTP database. Only those compounds with PCC > 0.6 are shown.<sup>b</sup> No correlations with PCC < 0.6

**Table S4**COMPARE results using the NCI/DTP standard agents database for the LC<sub>50</sub> endpoint

| $(S_{Os}, S_c)$ -[Os( $\eta^6$ - <i>p</i> -cym)(ImpyMe)I]PF <sub>6</sub> ( <b>2</b> ) |            |                                 | $(R_{Os}, R_c)$ -[Os( $\eta^6$ - <i>p</i> -cym)(ImpyMe)I]PF <sub>6</sub> ( <b>4</b> ) |            |                                |
|---------------------------------------------------------------------------------------|------------|---------------------------------|---------------------------------------------------------------------------------------|------------|--------------------------------|
| <b>Correlated agent</b>                                                               | <b>PCC</b> | <b>Mechanism</b>                | <b>Correlated agent</b>                                                               | <b>PCC</b> | <b>Mechanism</b>               |
| morpholino-ADR                                                                        | 0.946      | Topo I inhibitor                | morpholino-ADR                                                                        | 0.972      | Topo I inhibitor               |
| B-TGDR                                                                                | 0.899      | DNA antimetabolite              | B-TGDR                                                                                | 0.903      | DNA antimetabolite             |
| thioguanine                                                                           | 0.859      | DNA antimetabolite              | didemnin B                                                                            | 0.898      | Inhibits protein synthesis     |
| didemnin B                                                                            | 0.838      | Inhibits protein synthesis      | tetraplatin                                                                           | 0.857      | Alkylating agent               |
| tetraplatin                                                                           | 0.828      | Alkylating agent                | thioguanine                                                                           | 0.752      | DNA antimetabolite             |
| paclitaxel (Taxol)                                                                    | 0.796      | Antimicrotubule agent           | oxanthrazole                                                                          | 0.748      | Topo II inhibitor              |
| bispyridocarbazolum DMS                                                               | 0.751      | NA                              | paclitaxel (Taxol)                                                                    | 0.738      | Antimicrotubule agent          |
| mitramycin                                                                            | 0.740      | RNA antimetabolite              | vincristine sulfate                                                                   | 0.738      | Antimitotic agent              |
| oxanthrazole                                                                          | 0.725      | Topo II inhibitor               | maytansine                                                                            | 0.695      | Antimicrotubule agent          |
| maytansine                                                                            | 0.695      | Antimicrotubule agent           | mitramycin                                                                            | 0.659      | RNA antimetabolite             |
| vincristine sulfate                                                                   | 0.694      | Antimitotic agent               | chromomycin A3                                                                        | 0.636      | RNA antimetabolite (binds DNA) |
| chromomycin A3                                                                        | 0.678      | RNA antimetabolite (binds DNA)  | bispyridocarbazolum                                                                   | 0.634      | -                              |
| topotecan                                                                             | 0.673      | Causes double-strand DNA breaks | 5-azacytidine                                                                         | 0.608      | RNA/DNA antimetabolite         |
| L-asparaginase                                                                        | 0.667      | Protein synthesis inhibitor     | L-asparaginase                                                                        | 0.606      | Protein synthesis inhibitor    |
| vinblastine sulfate                                                                   | 0.659      | Antimitotic agent               | bactobolin                                                                            | 0.602      | Protein synthesis inhibitor    |
| 5-azacytidine                                                                         | 0.623      | RNA/DNA antimetabolite          | vinblastine sulfate                                                                   | 0.601      | Antimicrotubule agent          |
| bactobolin                                                                            | 0.612      | Protein synthesis inhibitor     |                                                                                       |            |                                |

NCI/DTP database. Only those compounds with PCC &gt; 0.6 are shown.

Complex  $3^*$  = a mixture of  $3$  ( $R_{Os}, R_C$ ) ■ and its epimer ( $S_{Os}, R_C$ ) ■

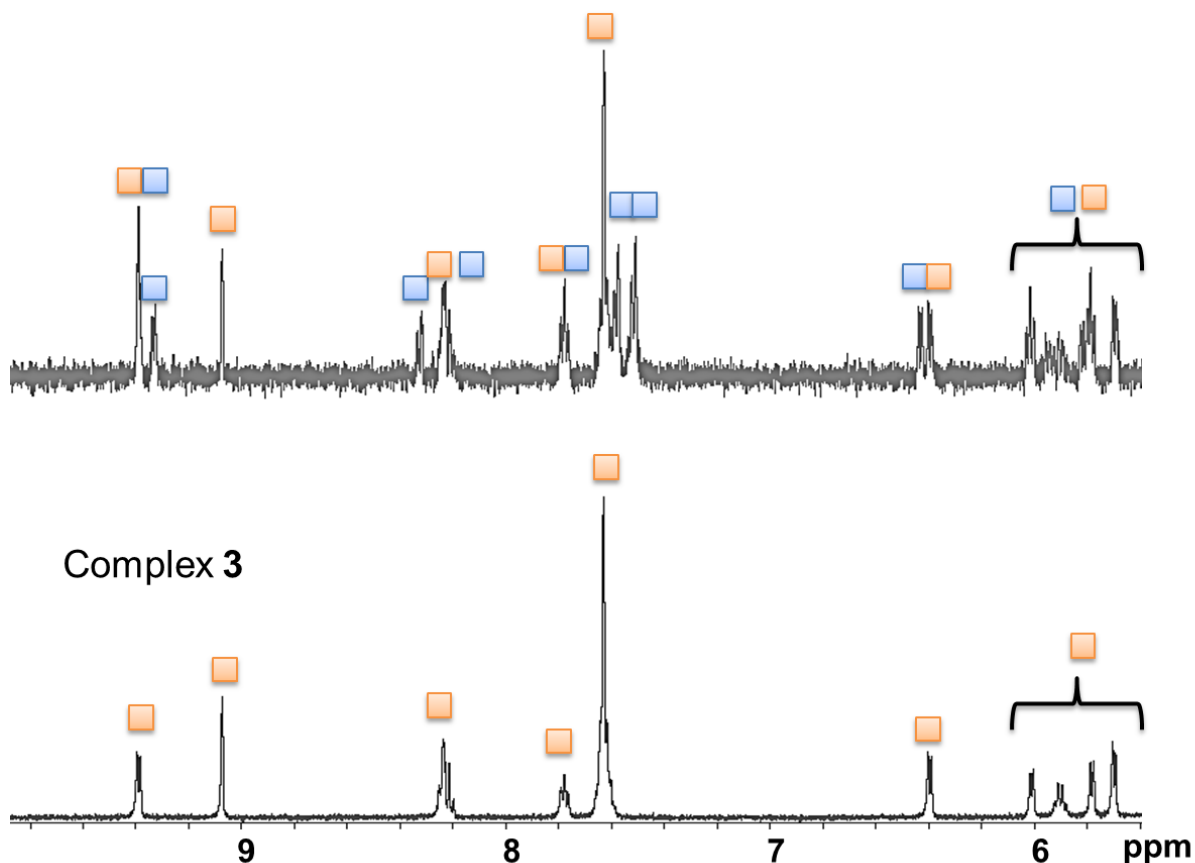

**Figure S1.** Comparison between the  $^1\text{H}$  NMR spectra of  $((R_{Os}, R_C)\text{-}[\text{Os}(\eta^6\text{-}p\text{-cym})(\text{ImpyMe})\text{Cl}]\text{PF}_6)$   $3$  (red square) and  $((R_{Os}, R_C)$  and  $(S_{Os}, R_C)\text{-}[\text{Os}(\eta^6\text{-}p\text{-cym})(\text{ImpyMe})\text{Cl}]\text{PF}_6)$   $3^*$  (red squares for complex  $3$  ( $R_{Os}, R_C$ ) and green squares for the epimer of  $3$  ( $S_{Os}, R_C$ )) in 10% MeOD/90%  $\text{D}_2\text{O}$  phosphate buffer ( $\text{pH}^* 7.4$ ). Orange crystalline  $3^*$  was isolated after concentrating the reaction mixture by evaporating off most of the solvent from the reaction flask.

(A) Complex 1

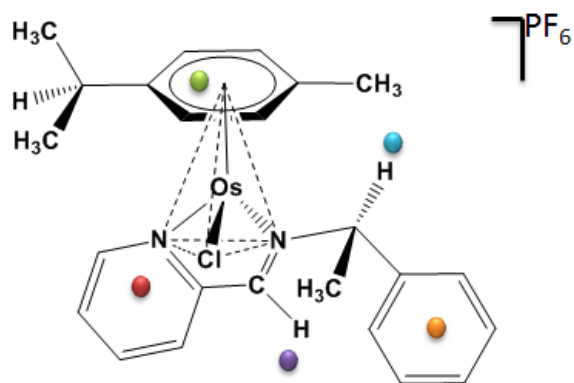

Complex 1:  $S_{Os}$ ,  $S_c$

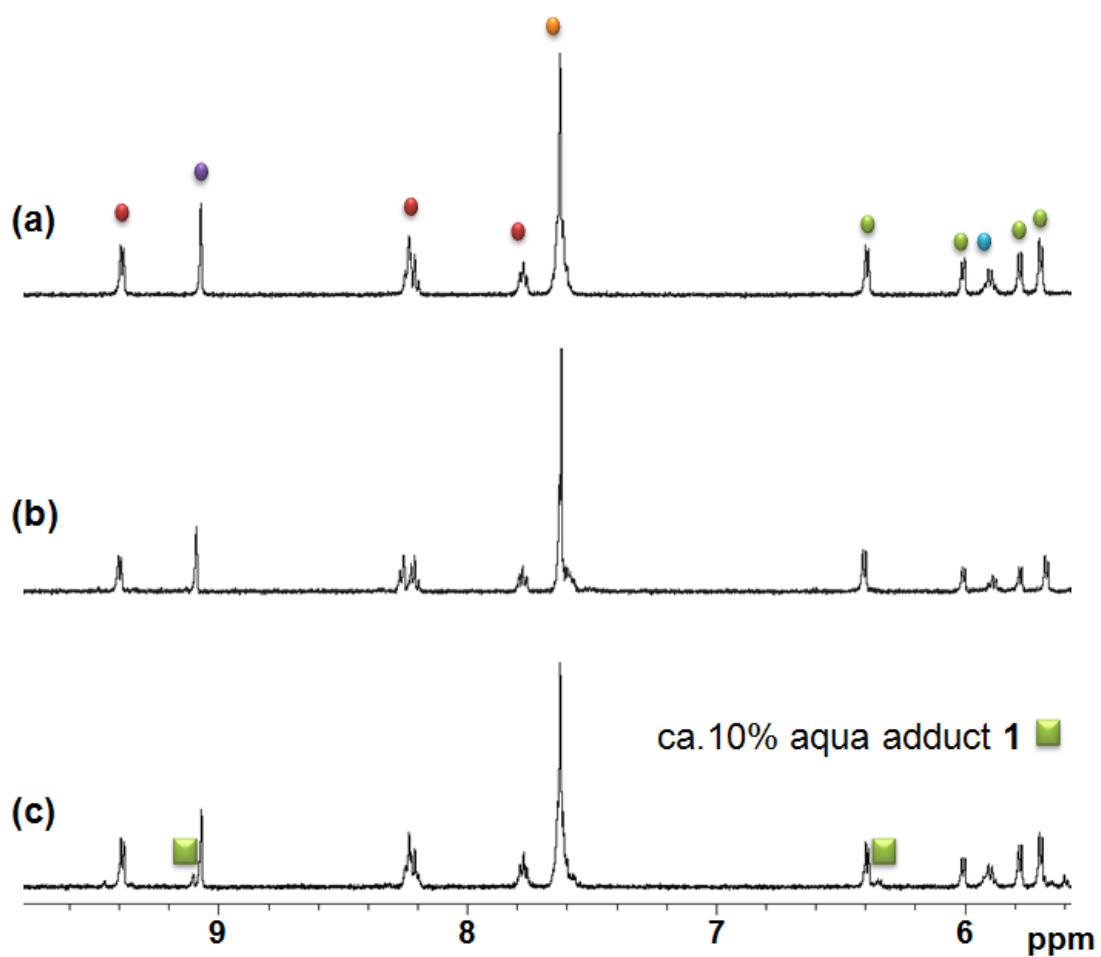



**(B) Complex 2**

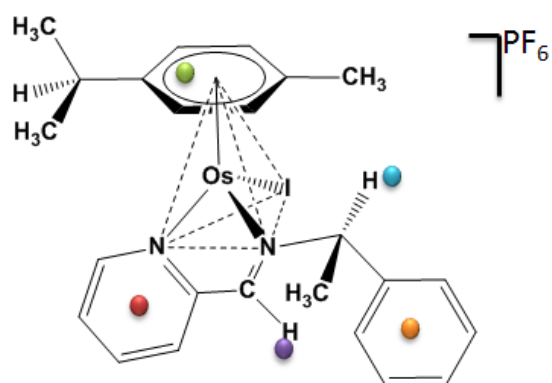

**Complex 2:  $S_{Os}$ ,  $S_C$**

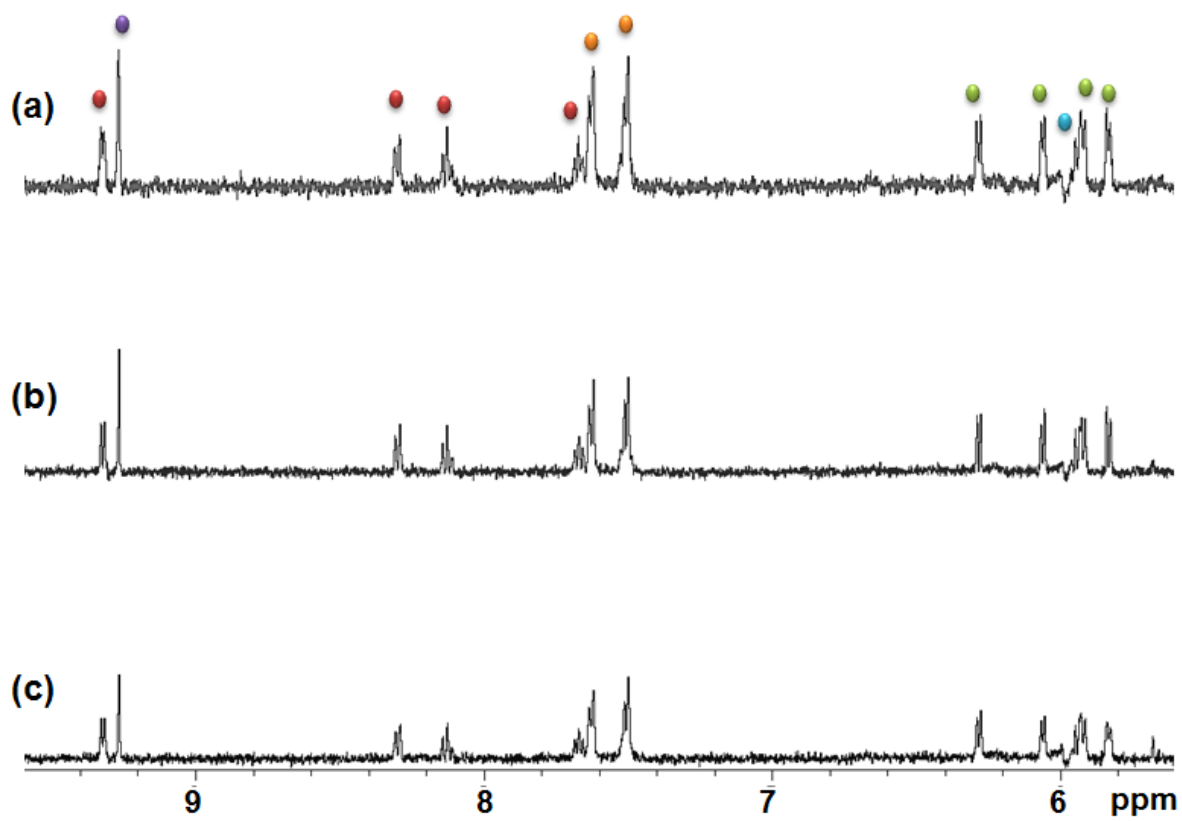

(C) Complex 3

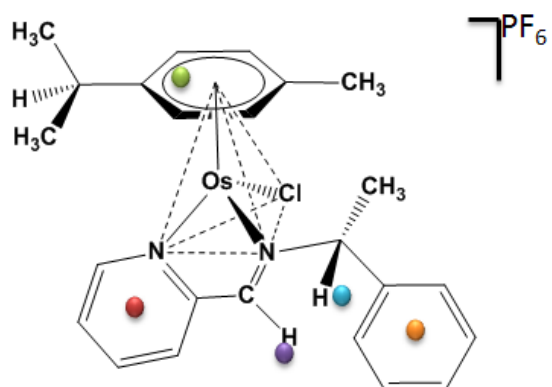

Complex 3:  $R_{Os}$ ,  $R_C$

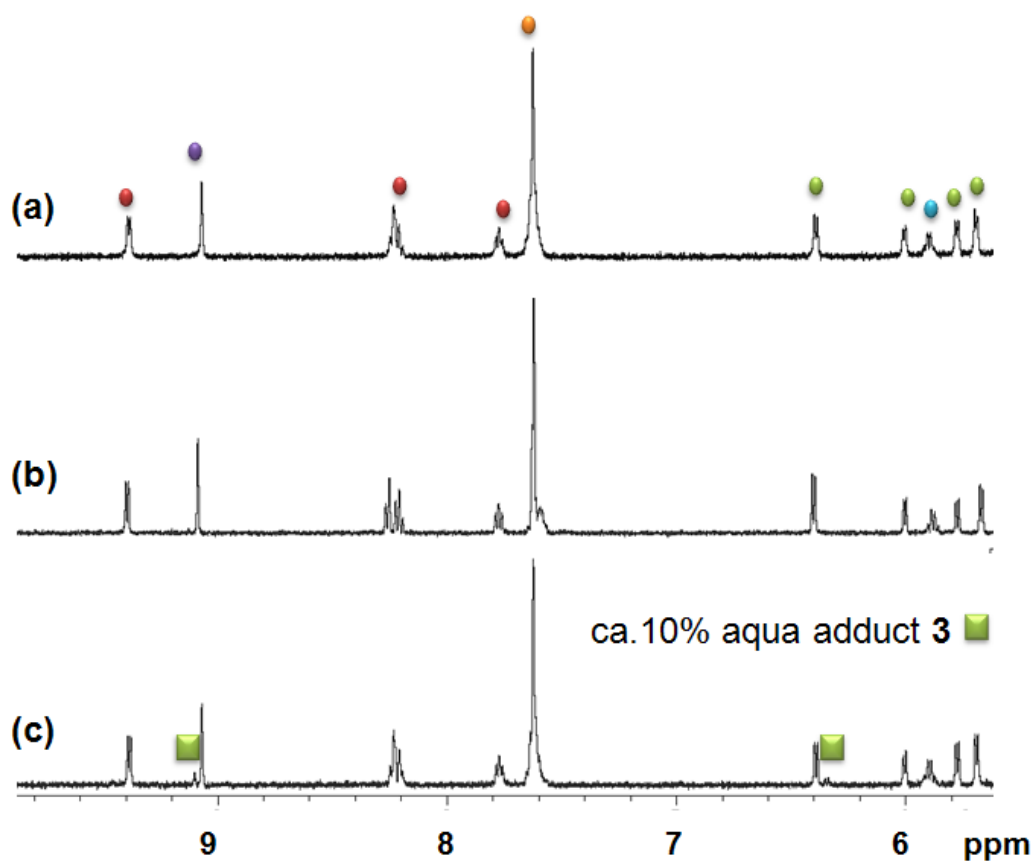

**(D) Complex 4**

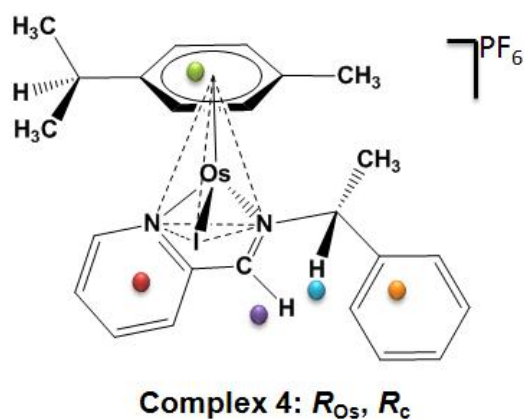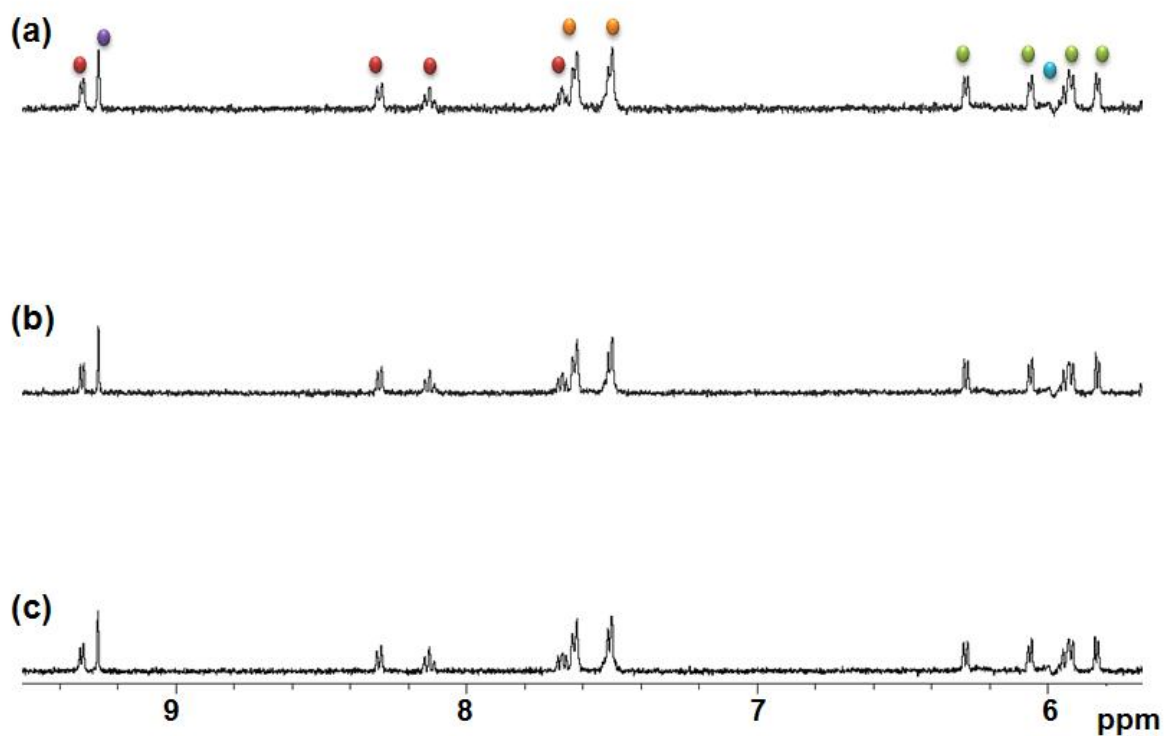

**Figure S2.** Aromatic region of the  $^1\text{H}$  NMR spectra of complexes **1** (A), **2** (B), **3** (C), and **4** (D) at a concentration of  $100\ \mu\text{M}$  in 10% MeOD/90%  $\text{D}_2\text{O}$  phosphate buffer ( $\text{pH}^* 7.4$ ) at  $t=0$  h and after incubation for 24 h at 310 K under different conditions: **(a)** time 0 h NMR spectra recorded immediately (within 10 min) after preparation of the samples; **(b)** NMR spectra recorded after incubating the samples for 24 h at 310 K with NaCl (500 mM) to suppress aquation, and **(c)** without NaCl.

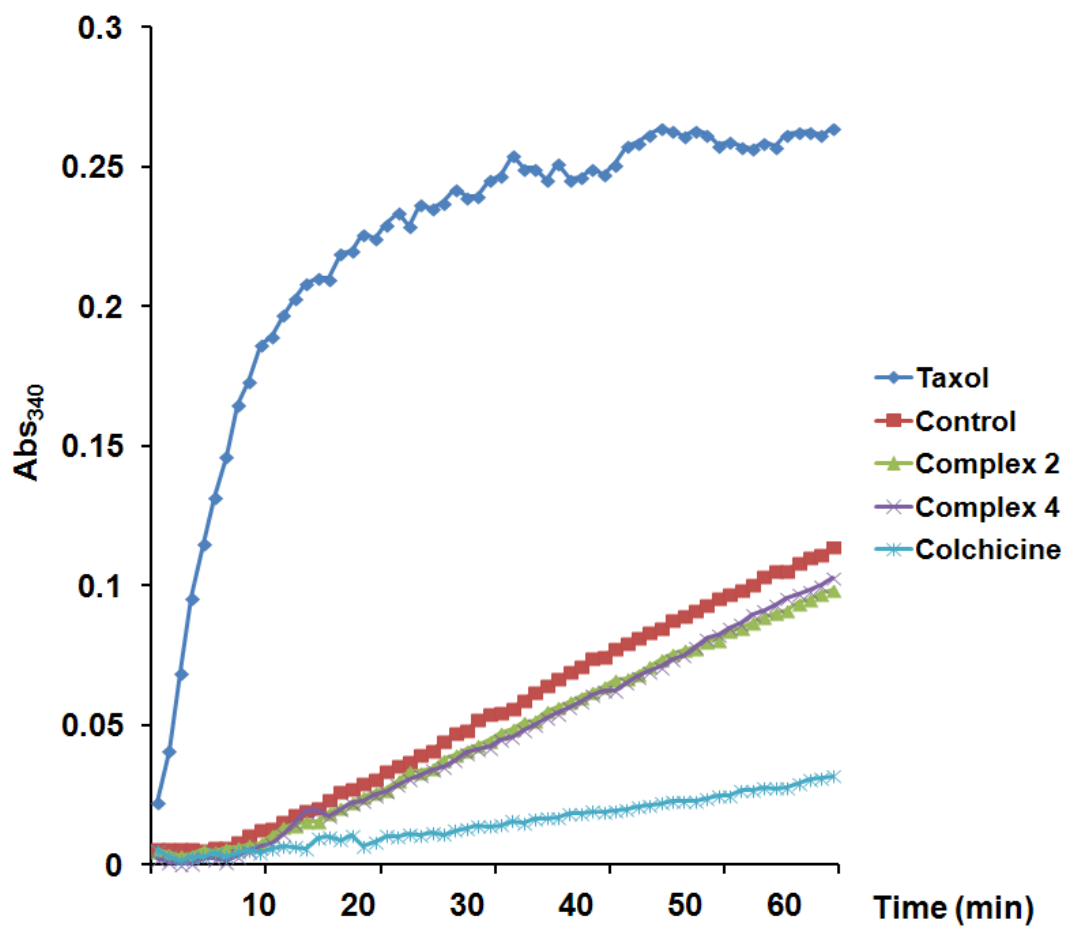

**Figure S3.** Effects of taxol (facilitator), complex 2, complex 4 and colchicine (inhibitor) on tubulin polymerization *in vitro*. The absorbance at 340 nm (Abs<sub>340</sub>) was recorded over a period of 1 hour at 310 K.

(A)

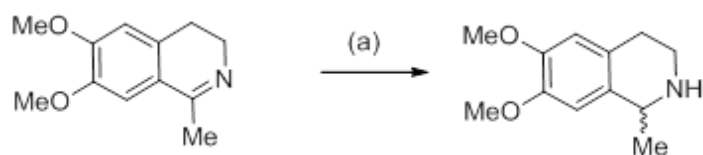

Reagents and Conditions: (a) Catalyst, FA:TEA (5:2),  
28-60 °C, 18 h - 41 h

| Catalyst | Temperature | Time | % Conv | % ee               |
|----------|-------------|------|--------|--------------------|
| 2        | 318 K       | 22 h | 40%    | 22.0% ( <i>R</i> ) |
| 2        | 333 K       | 18 h | 76%    | 22.0% ( <i>R</i> ) |
| 4        | 301 K       | 23 h | 20%    | 22.7% ( <i>R</i> ) |

(B)

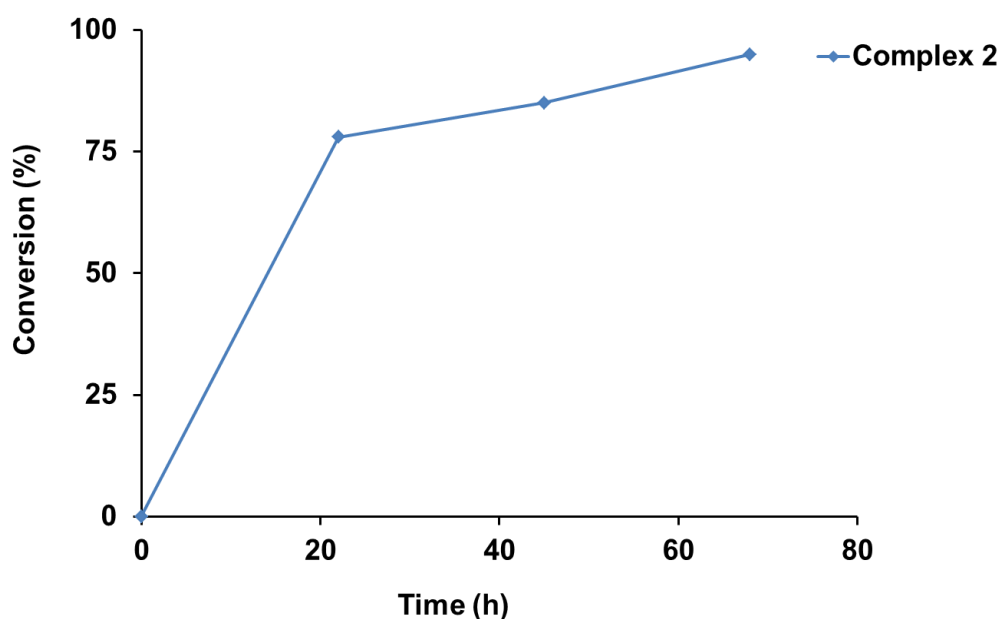

**Figure S4.** (A) Enantiomeric excess and conversions for the imine reduction of (6,7-dimethoxy-1-methyl-3,4-dihydroisoquinoline) by formate catalyzed by **2** and **4** at various temperatures after different periods of time. (B) Time dependence of the extent of reduction of the cyclic imine (6,7-dimethoxy-1-methyl-3,4-dihydroisoquinoline) by formate catalyzed by complex **2** at 333 K at different time points. Conditions: imine (25 mg), catalyst (1 mol%) in FA (formic acid) : TEA (triethylamine) = 5:2 (total volume = 0.1 mL).
